# Supplementary material
Source: publisher figshare collection journal article supplement (https://acs.figshare.com/ndownloader/files/3935209)

## Supplementary Figures

**Figure S1.** Dependence of input parameters within *trj\_cavity* upon cavity characterization. **(A)** Mean internal cavity surface (purple spheres) calculated for Der p 2, using different values of the *-dim* option, as indicated inset, and a value of 1.4 Å for the *-spacing* option. The estimated volumes are 1.31 nm<sup>3</sup> (dim = 2, 3); 1.25 nm<sup>3</sup> (dim = 4), 0.87 nm<sup>3</sup> (dim = 5), and 0.75 nm<sup>3</sup> (dim = 6). The protein is shown perpendicular to the cavity entrance axis (top panel), and rotated by 90° (bottom panel), with both cartoons representation and all-atoms overlapping in CPK format to highlight the source of cavity exit/entry tunnels. **(B)** Mean internal cavity surface (purple spheres) calculated for Der p 2, using different values of the *-spacing* option, as indicated inset, and a value of 6 for the *-dim* option. The crystal structure of Der p 2 (left) with two modelled bound lysophosphatidylcholine molecules is compared to cavities using grid sizes of 0.5 Å (volume = 1.58 nm<sup>3</sup>); 0.8 Å (volume = 0.95 nm<sup>3</sup>); and 1.4 Å (volume = 0.75 nm<sup>3</sup>). Protein is shown in cartoons representation. **(C)** Mean internal cavity surface calculated for Der p 2, using alternative input index groups (specified using the *-n* option), and values of 6 for the *-dim* option and 1.4 Å for the *-spacing* option. Two different index groups were specified, corresponding to either the protein region coloured in red alone, or the protein regions including both red and cyan (i.e. the entire protein); the corresponding internal cavities are displayed in opaque blue spheres or transparent blue surface, respectively. Protein is displayed in cartoons representation.

**Figure S2.** Predicted sugar binding mode in PulA<sub>Kox</sub>. In **(A)** the internal cavity for PulA<sub>Kox</sub> detected by *trj\_cavity* (transparent blue) is shown, with possible sugar-binding (purple/orange sticks format) and catalytic (spacefill format) residues shown in violet, and in **(B)** the approximate predicted site for recognition of sugar substrate (CPK sticks format) is highlighted, following structural alignment with PulA<sub>KPn</sub>. Binding would be sterically blocked by overlap of cavities in N1 and A domains. The protein is shown in cartoons format, coloured according to the five domains: N1 (dark blue), N2 (green), N3 (cyan), A (yellow) and C (purple). Membrane lipids are shown in CPK sticks format.

**Figure S3.** Quantitative measures of dynamic protein and cavity descriptors. **(A)** Comparison of the cavity volume estimated using *trj\_cavity* (red line) with that from MDPocket (black line), calculated for the Der p 2 hydrophobic cavity during 100 ns of simulation. **(B)** Protein

backbone root-mean-squared deviation (RMSD) calculated for Der p 2. **(C)** Comparison of the bottleneck radius estimated using *trj\_cavity* (red line) with that from Caver (black line), calculated for the NavMs channel during 1000 ns of simulation in the presence of sodium.

**Figure 1**

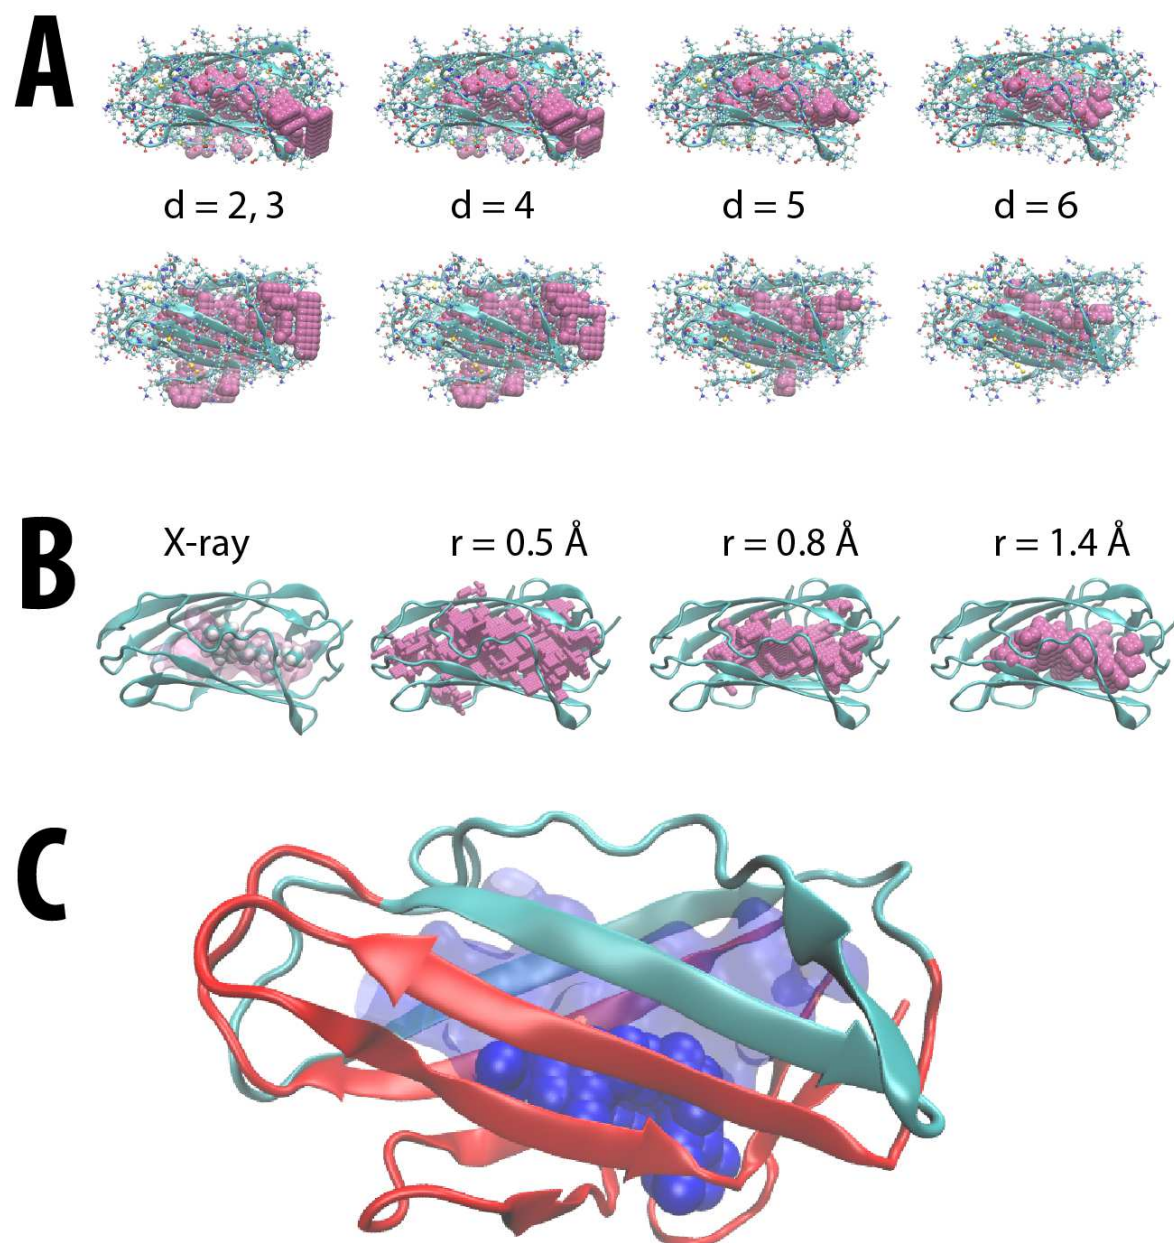

**Figure 2**

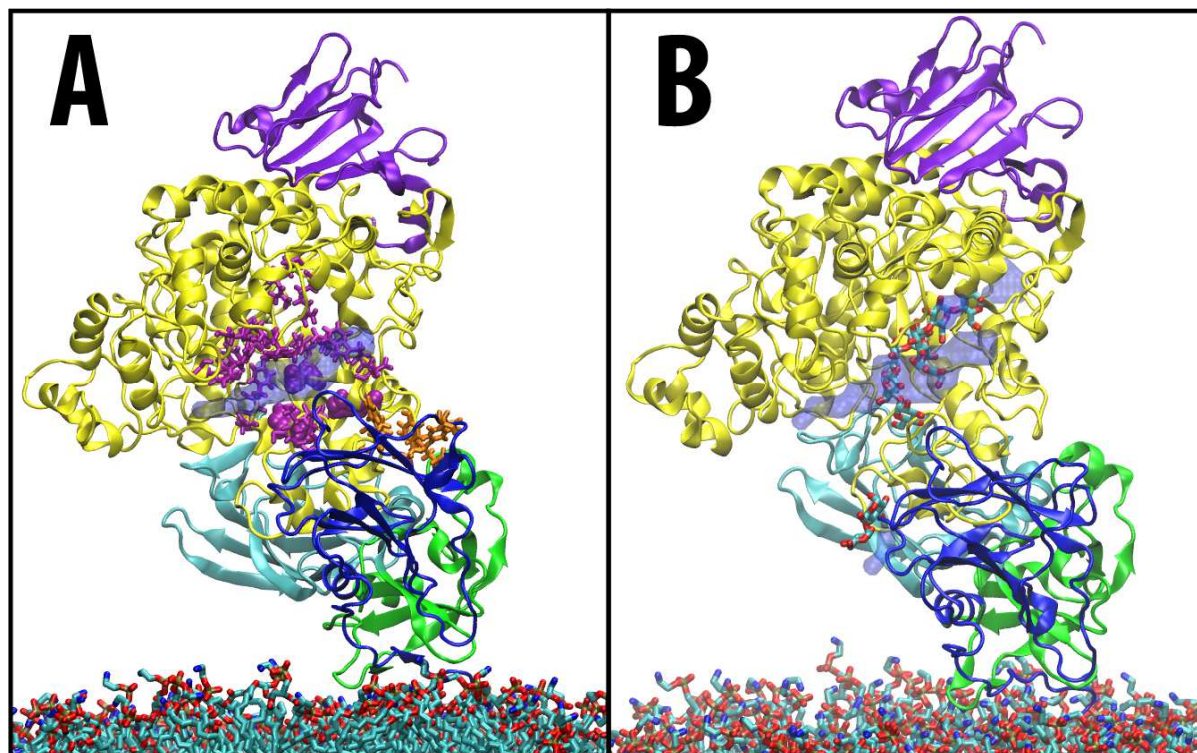

**Figure 3**

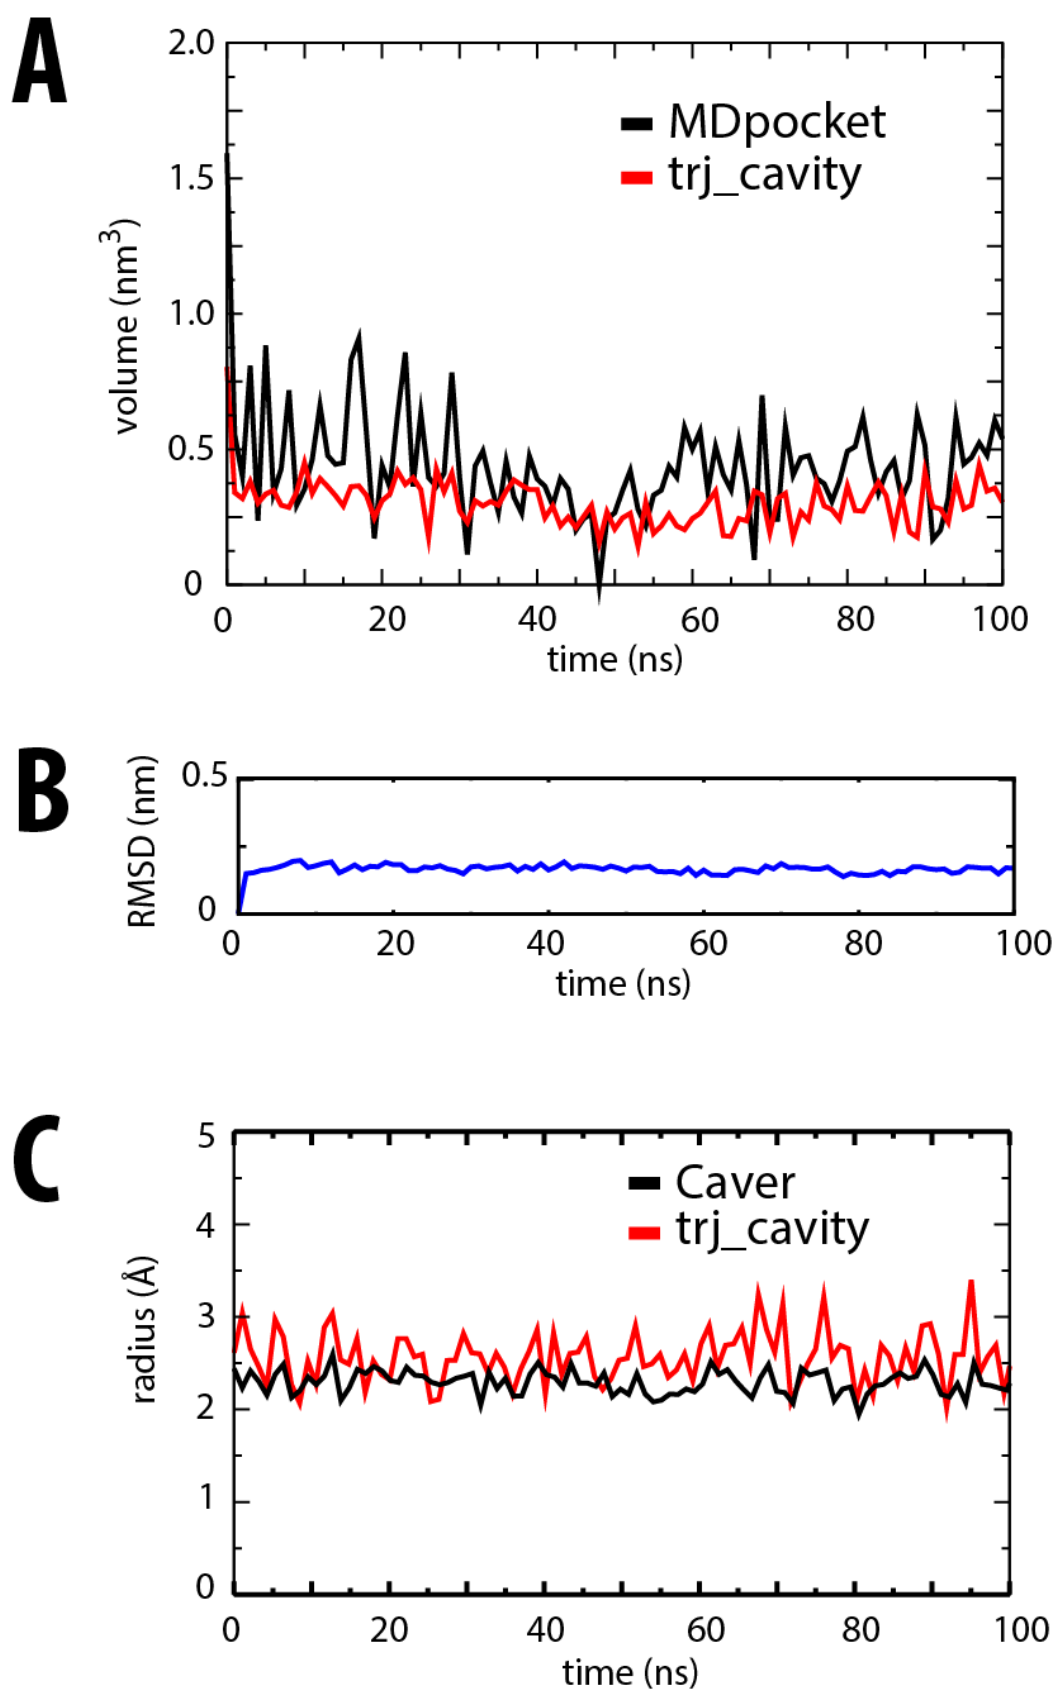

Supplement: Supplementary file 1 [file 3935209]
